# Supplementary material for: Green Synthesis of Silver-Decorated Magnetic Particles for Efficient and Reusable Antimicrobial Activity
Source: MDPI journal article supplement (doi:10.3390/ma14247893), 2021-12-20
Supplement: s1 [file s1]

**Table S1.** Total phenolic contents and antioxidant activity of the green tea extract in different solvents.

| Sol-<br>vents | Total Phenolics                                                     | ABTS                                                                  | DPPH Activity                                                         |
|---------------|---------------------------------------------------------------------|-----------------------------------------------------------------------|-----------------------------------------------------------------------|
|               | ( $\mu\text{g}$ of gallic acid equivalent $\text{mL}^{-1}$ extract) | ( $\mu\text{g}$ of ascorbic acid equivalent $\text{mL}^{-1}$ extract) | ( $\mu\text{g}$ of ascorbic acid equivalent $\text{mL}^{-1}$ extract) |
| Water         | 1346                                                                | 2684                                                                  | 1869                                                                  |
| Ethanol       | 104.6                                                               | 342.6                                                                 | 173.8                                                                 |

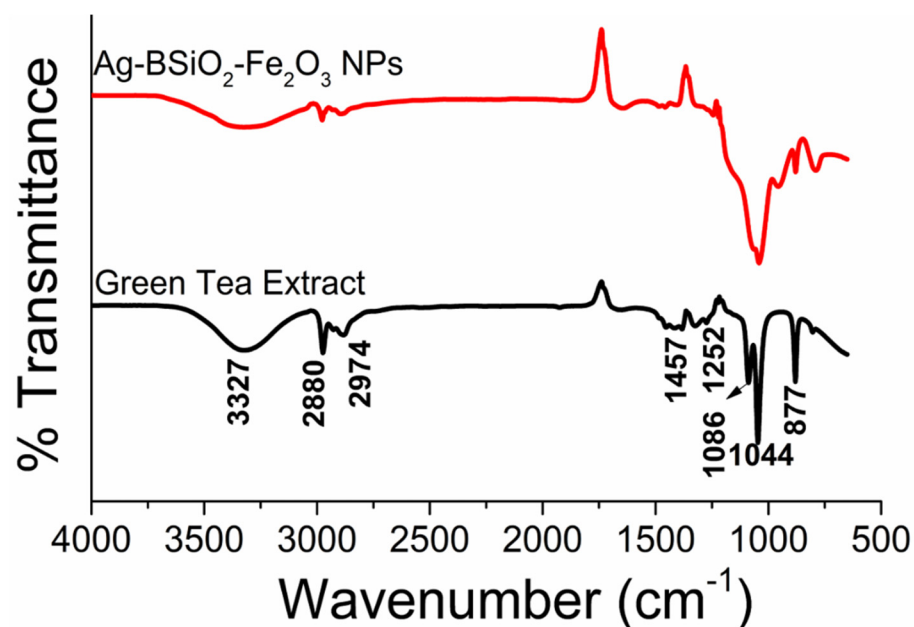

**Figure S1.** FT-IR spectroscopy analysis of green tea extract and Ag-BSiO<sub>2</sub> NPs-Fe<sub>2</sub>O<sub>3</sub> NPs.

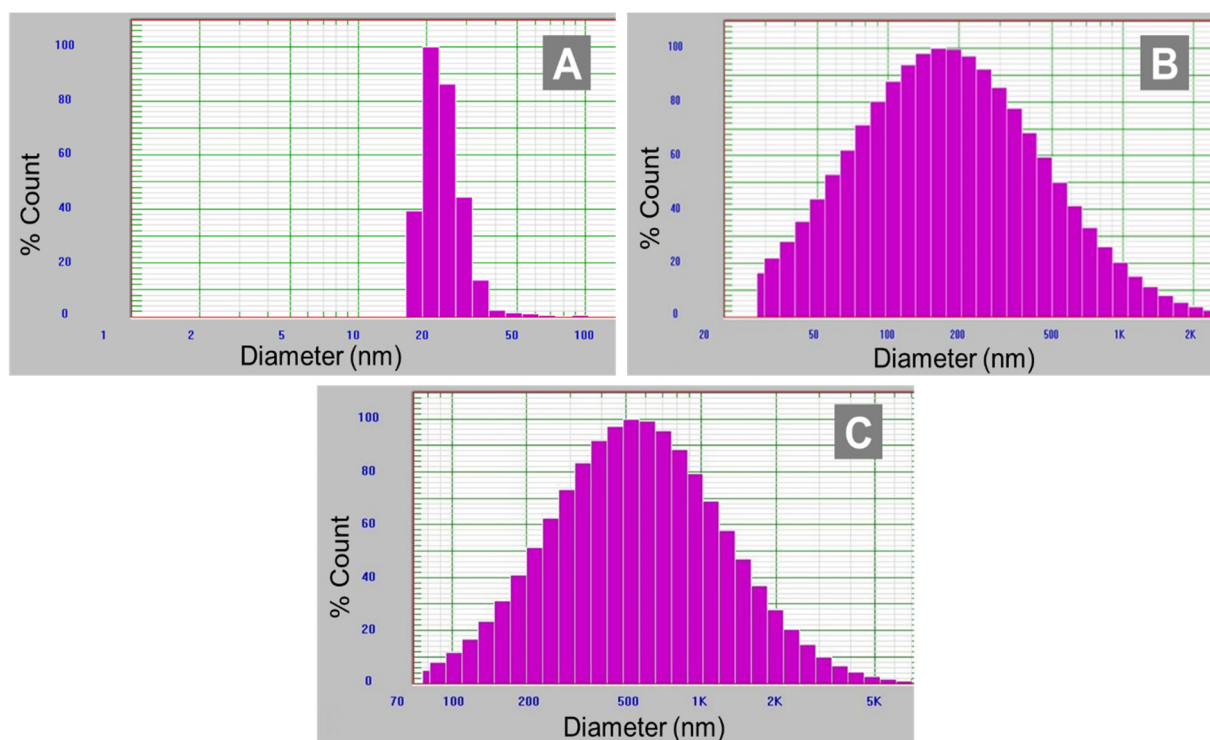

**Figure S2.** The Dynamic light scattering (DLS) analysis of colloids suspension of (A) Ag NPs, (B) Fe<sub>2</sub>O<sub>3</sub> NPs, and (C) Ag-BSiO<sub>2</sub>-Fe<sub>2</sub>O<sub>3</sub> NPs.

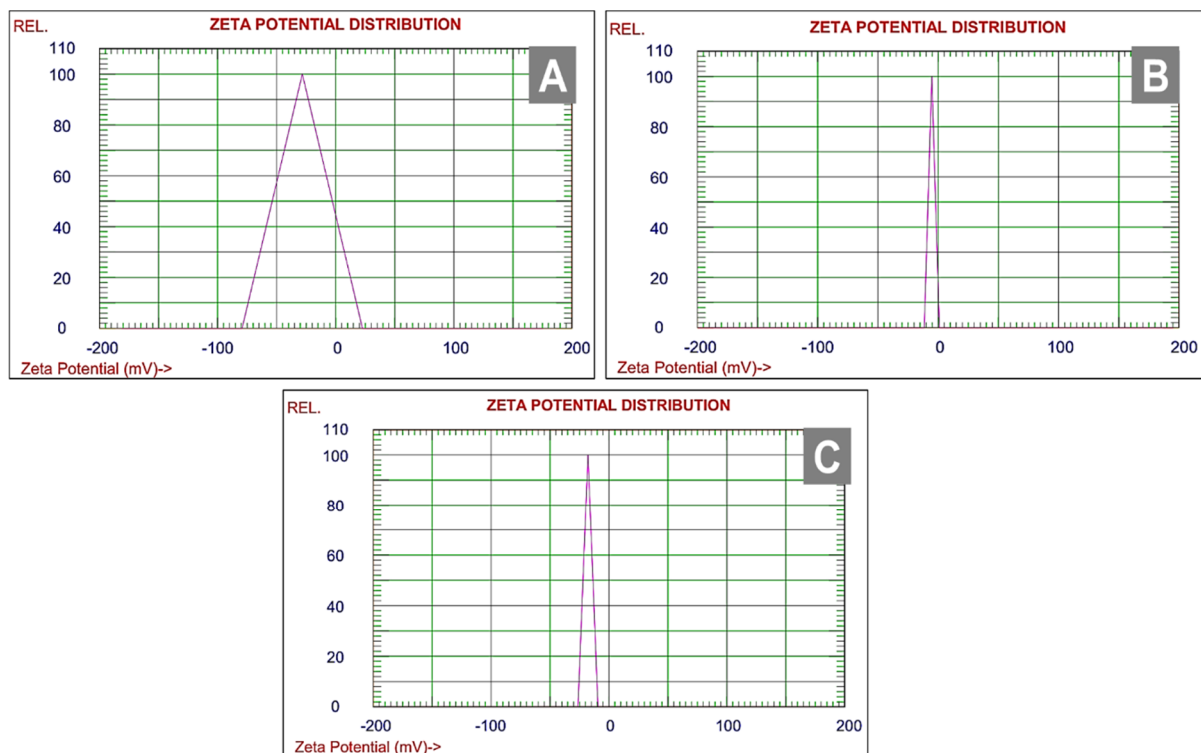

**Figure S3.** The zeta potential analysis of colloids suspension of (A) Ag NPs, (B) Fe<sub>2</sub>O<sub>3</sub> NPs, and (C) Ag-BSiO<sub>2</sub>-Fe<sub>2</sub>O<sub>3</sub> NPs.

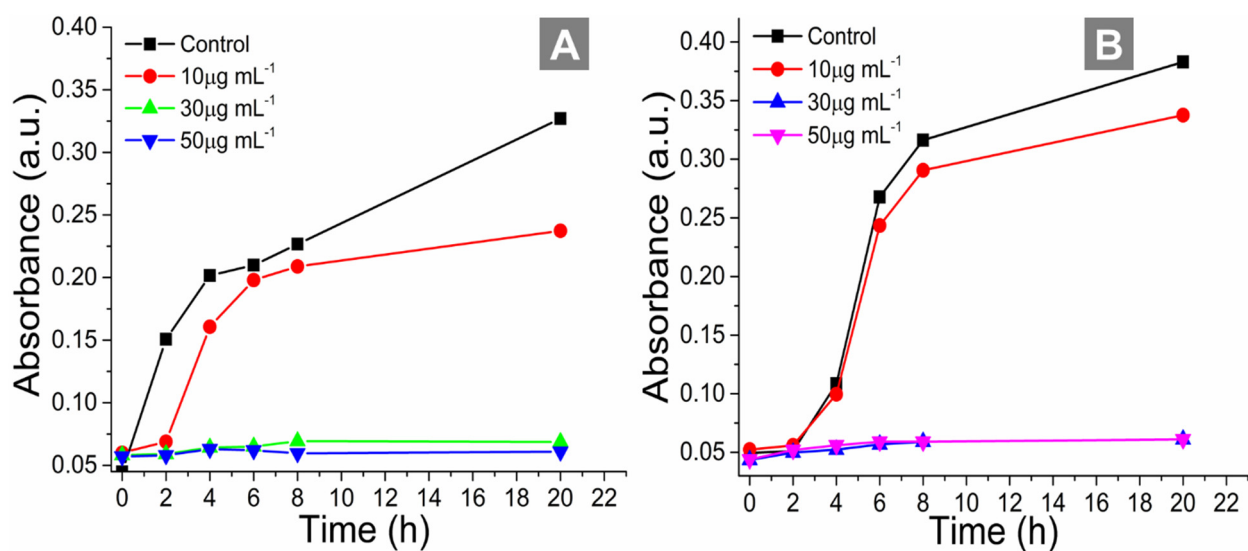

**Figure S4.** Growth curves of (A) *S. aureus* and (B) *E. coli* with various concentrations of the streptomycin antibiotics.

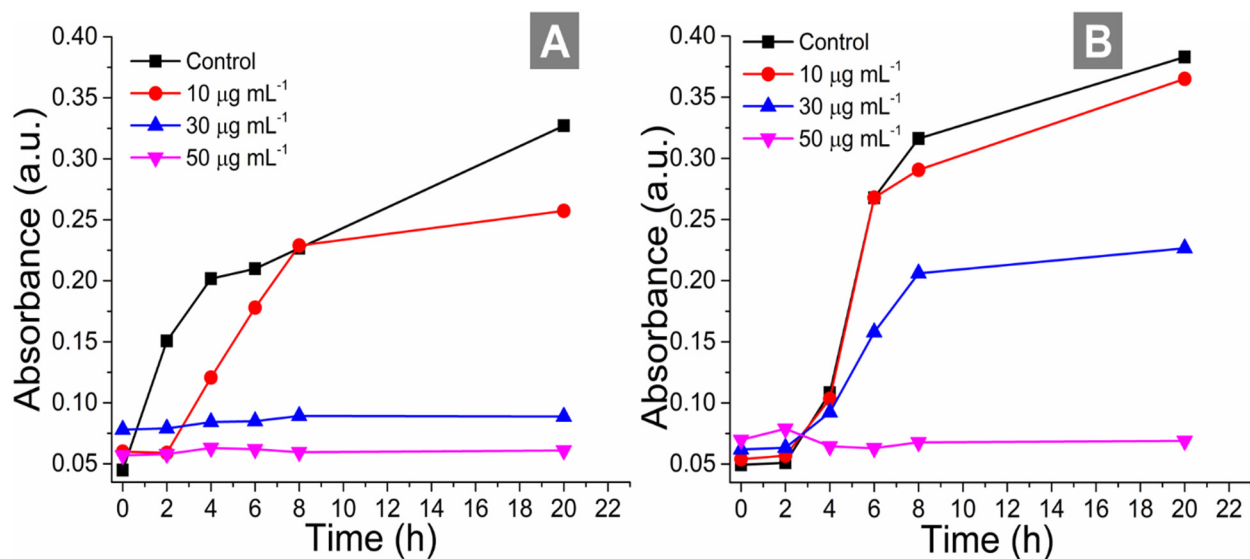

**Figure S5.** Growth curves of (A) *S. aureus* and (B) *E. coli* with various concentrations of the AgNPs.

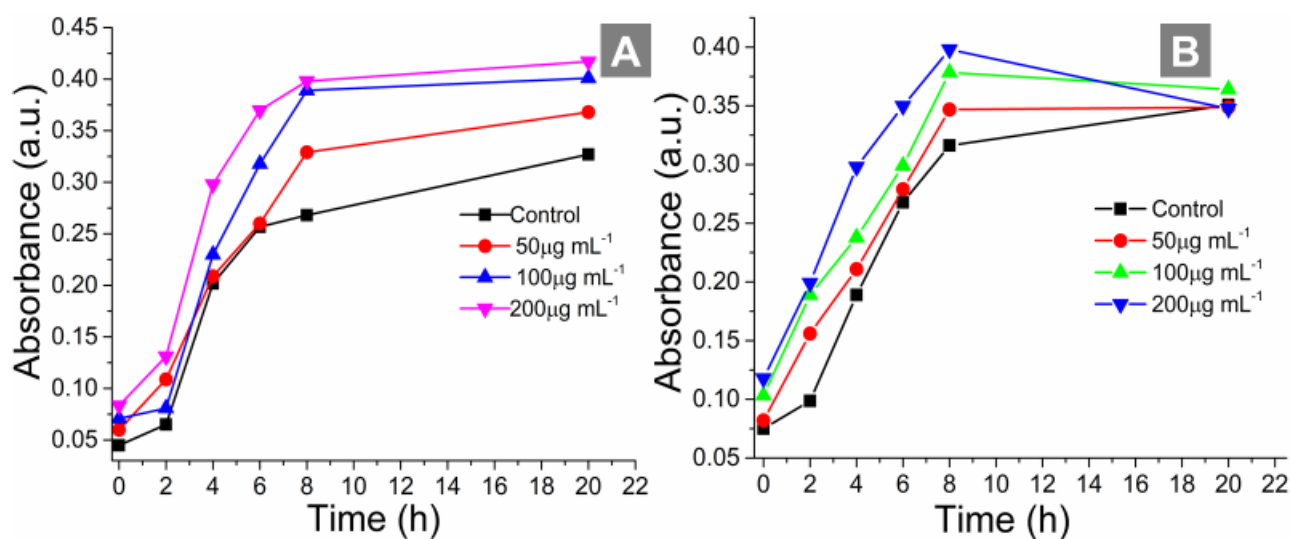

**Figure S6.** Growth curves of (A) *S. aureus* and (B) *E. coli* with various concentrations of the  $\text{Fe}_2\text{O}_3$  NPs.

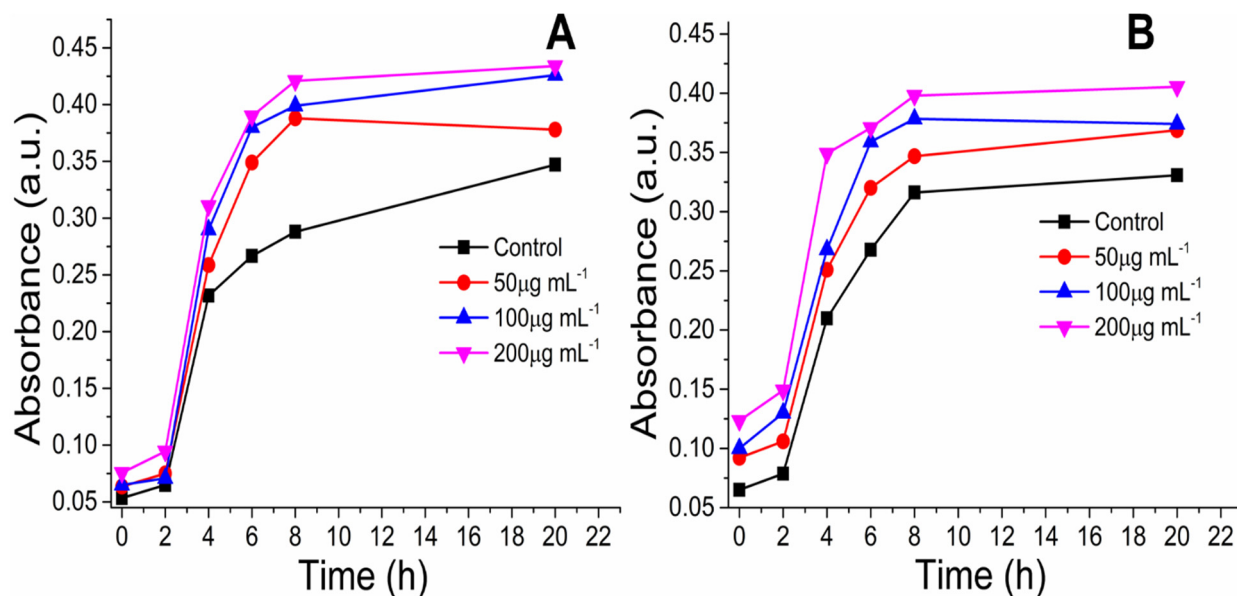

**Figure S7.** Growth curves of (A) *S. aureus* and (B) *E. coli* with various concentrations of the  $\text{BSiO}_2\text{-Fe}_2\text{O}_3$  NPs.

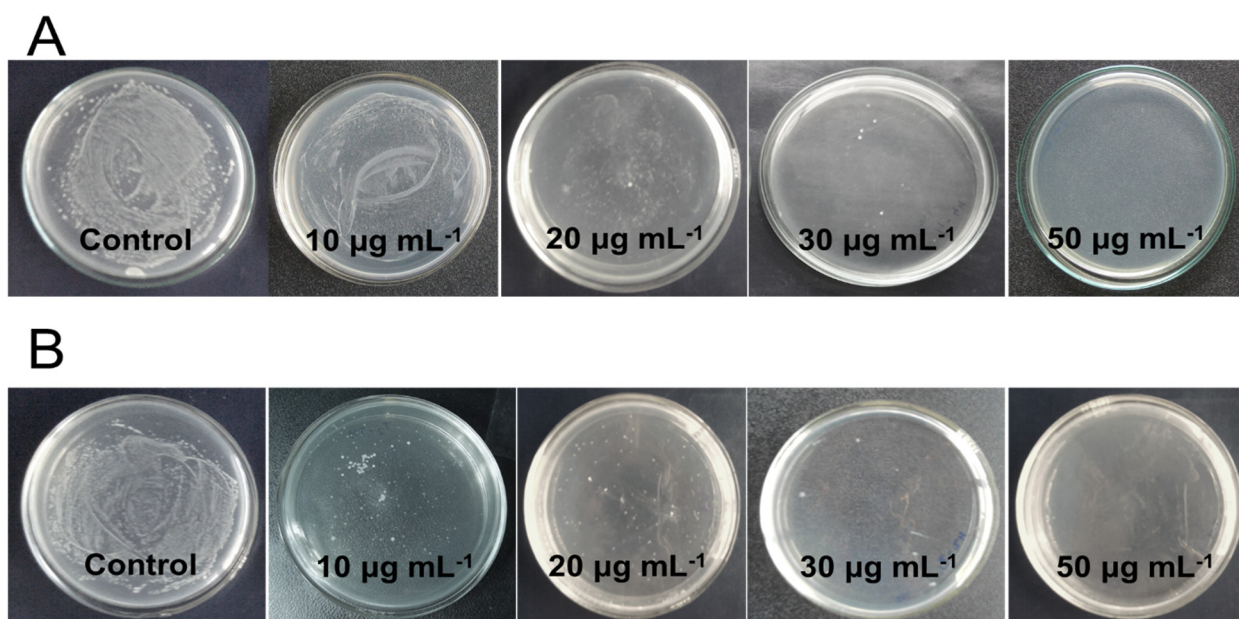

**Figure S8.** Growth plate photographs of (A) *S. aureus* and (B) *E. coli* with various concentrations of streptomycin antibiotics.

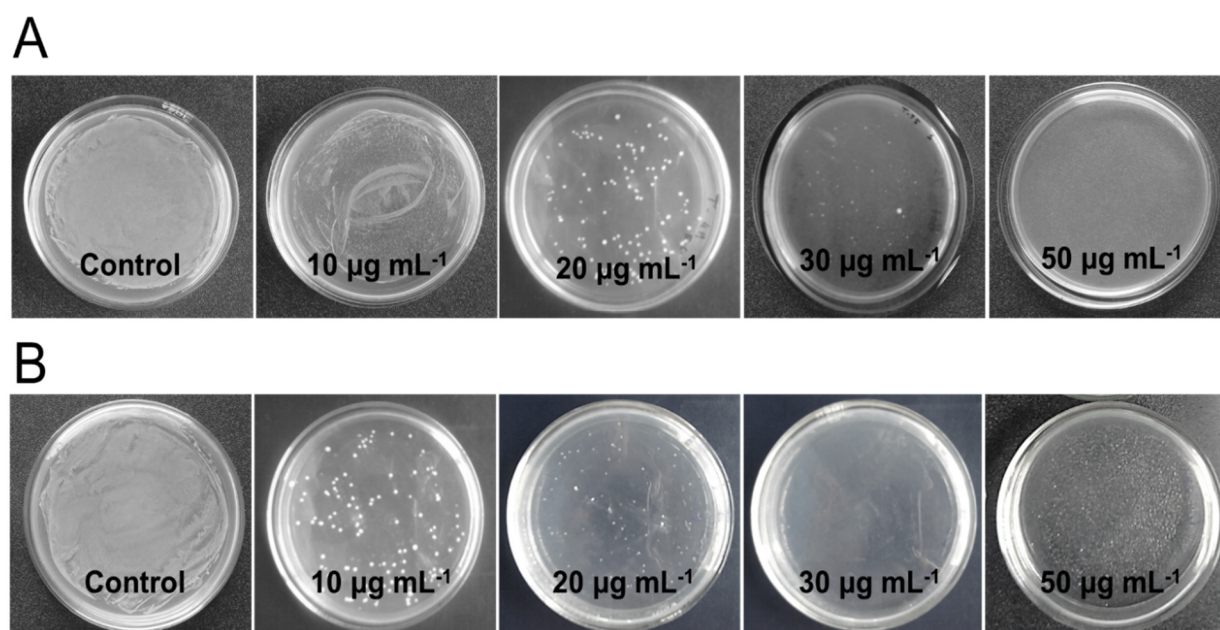

**Figure S9.** Growth plate photographs of (A) *S. aureus* and (B) *E. coli* with various concentrations of Ag NPs.



A

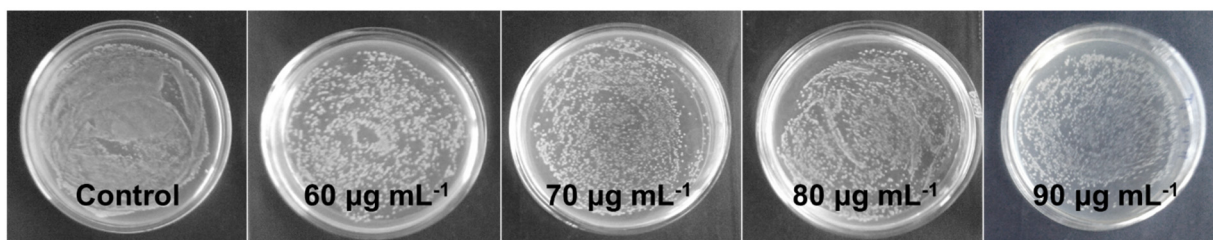

B

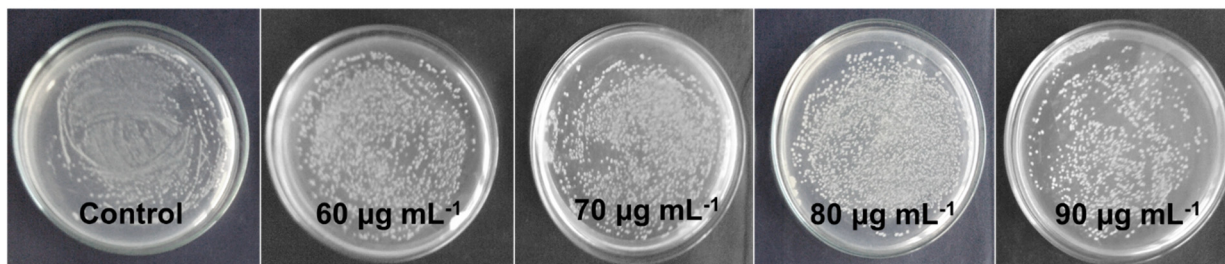

Figure S10. Growth plate photographs of (A) *S. aureus* and (B) *E. coli* with various concentrations of  $\text{Fe}_2\text{O}_3$  NPs.

A

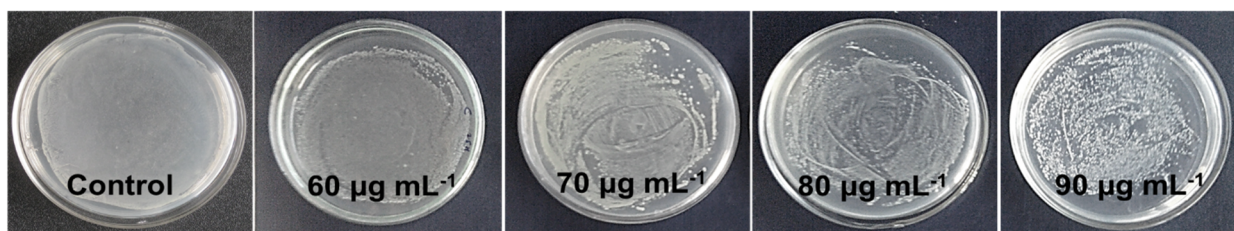

B

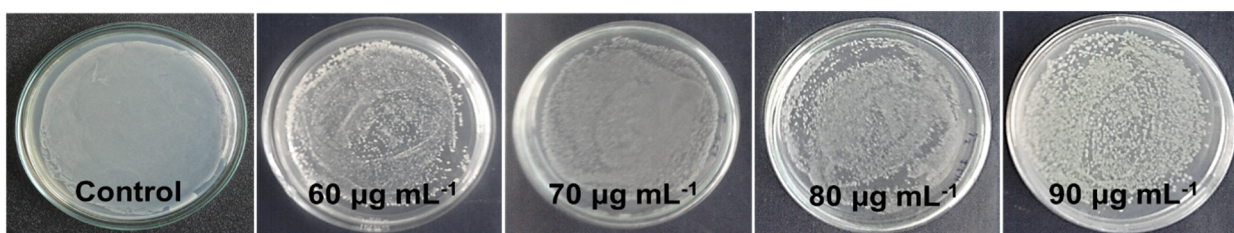

Figure S11. Growth plate photographs of (A) *S. aureus* and (B) *E. coli* with various concentrations of  $\text{BSiO}_2\text{-Fe}_2\text{O}_3$  NPs.

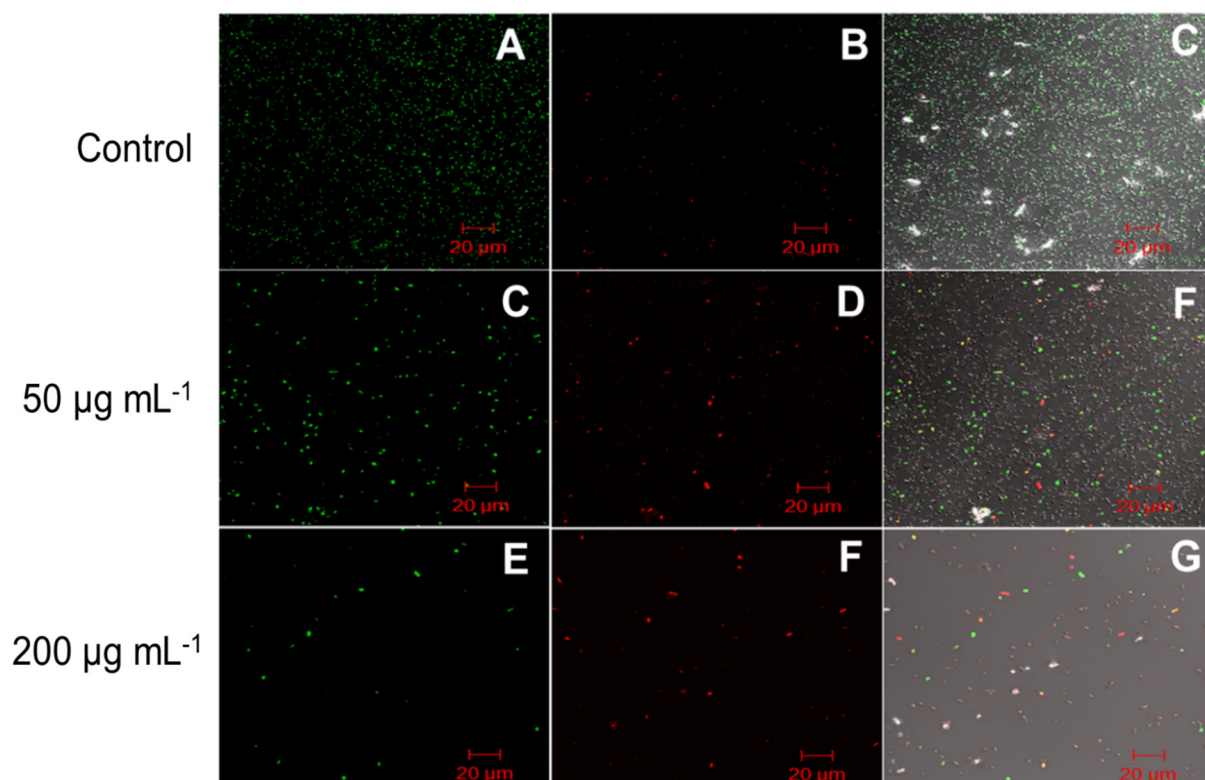

**Figure S12.** CLSM microscopy images of the antimicrobial activity of Ag-BSiO<sub>2</sub>-Fe<sub>3</sub>O<sub>4</sub> nanoparticles against *E. coli*.

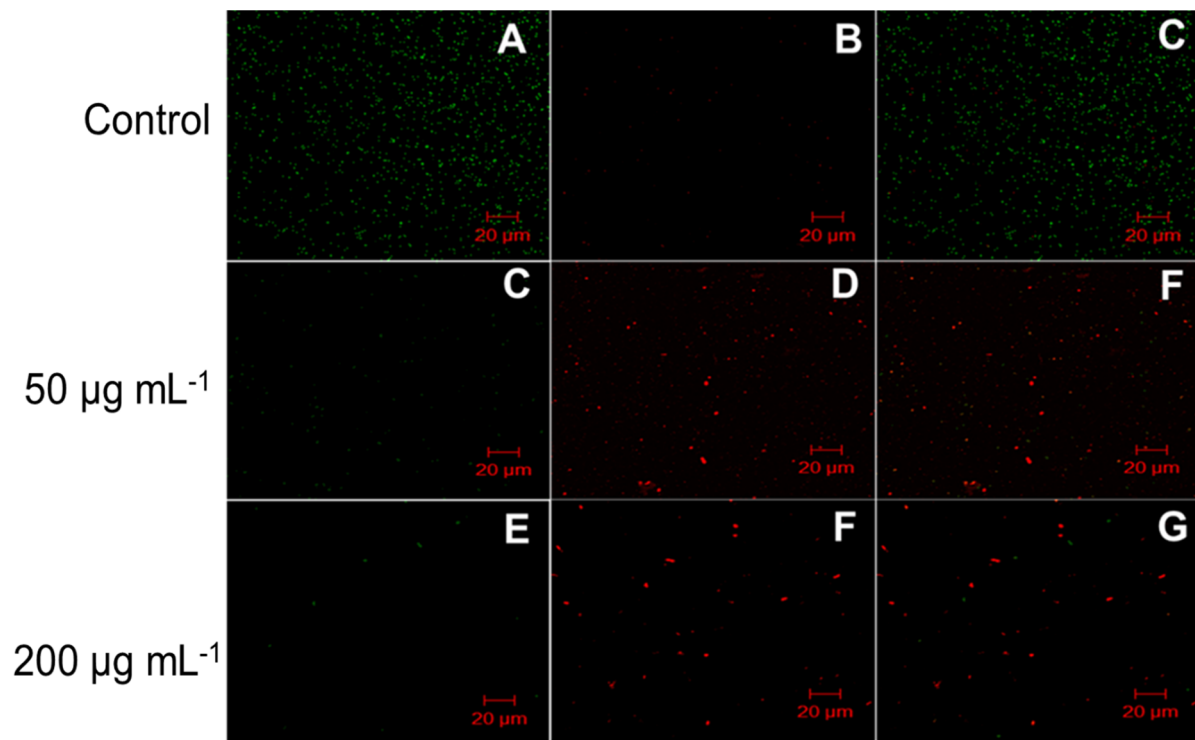

**Figure S13.** CLSM microscopy images of the antimicrobial activity of Ag-BSiO<sub>2</sub>-Fe<sub>3</sub>O<sub>4</sub> nanoparticles against *S. aureus*.
